# Supplementary material for: Quality assessment of aerosol lidars at 1064 nm in the framework of the MEMO campaign
Source: Copernicus journal article supplement (doi:10.5194/amt-2023-23), 2023-03-06
Supplement: Supplementary file [file amt-2023-23-AC1-supplement.pdf]

*The authors would like to thank the reviewer for the thoughtful and helpful comments and suggestions, which have made a significant contribution to the improvement of the paper. We have considered all the comments and questions posed by the reviewer. They are listed one by one in this letter and implemented in the manuscript as text in blue color.*

### **General comments**

This paper presents a comparison of lidar signals and the derived aerosol parameters between 6 different lidar systems using a inter-comparison strategy recommended by EARLINET. The objective is to evaluate the performance of different lidar systems and quantify their consistency. Such work is important to the scientific community and has to be done for lidar networking. However, such comparison is not easy to organize, because of the transportation of lidars, arrangement of the campaign, the strategy of data comparison and so on. The subject fits very well the scope of <Atmospheric Measurement and Technique>. It is a pity that (at least it seems) the campaign did not last long, since I did not see measurements on multiple days and with different aerosol loading, clean atmosphere and cloudless conditions. The presentations of results are well done and results are well analyzed. As to academic writing, I suggest the author and co-authors spending more time on polishing the manuscript before getting it published.

*Answer: Thank you for the general evaluation and pointing out this unclarity in the description. We have polished the manuscript by all the co-authors' prof-reading again.*

Be careful with the following 3 points:

- Remember to not use long sentence if you are not sure you can handle the grammar and logic in complicated sentences.

*Answer: We agree with reviewer's suggestion. We have re-written some long sentence in order to make easier to readership.*

- Avoid colloquial expressions. In particular, be careful with the words such as 'maybe', 'probably', 'might' and so on. There are quite a few expressions like this throughout

the manuscript. It is OK to have open questions or unresolved issues in a scientific paper, but you should state clearly what the causes/considerations are. Otherwise, it gives the readers an impression that the results or conclusions are vague and informal and cannot be trusted.

[Answer: We thank the reviewer's suggestion. We have carefully checked our statement on those points.](#)

- Make it shorter. I would expect this paper to be concise and compact. The author should focus on the main messages that he/she wants to address to the readers.

Moreover, I see it not necessary to have a separate section 'Discussion' with only the comparison of dark measurement. The discussion part is supposed to analyze and interpret the results of the study, but it is not the case here.

[Answer: We agree with the reviewer. The goal of this study is to evaluate the performance of different lidar systems using the reference lidar, so we decided to compact the self-test part. The content of discussion has been re-organized into the self-test section correspondingly in the manuscript. \(The similar suggestion was made out by the other reviewer\).](#)

Specific comments

P1L13-15: "In the end, the lidar systems were quality assured, of which the standard deviation of range-corrected signal can be controlled within 5 % at 500-2000 m while 10 % at 2000-5000 m." → One example for consideration "In the end, the lidar systems passed the quality control/assurance, ensuring that the standard deviation of range-corrected signal could be controlled within 5% at 500-2000 m and 10% at 2000-5000 m"

[Answer: Thank you. We have modified in the manuscript as suggested.](#)

P2L29: ' a large ground-based lidar networks': remove 'a'

[Answer: It has been corrected.](#)

P2L45: 'While to achieve', remove 'while'

[Answer: It has been corrected.](#)

P2L51-52: "Since European lidar technology was independently developed at different stations from different countries,"-> "Since lidar systems in EARLINET were developed

independently at stations in different countries..” .

[Answer: It has been corrected.](#)

This sentence is not clear-- “the devices and algorithms used are not the same (D’Amico et al., 2015)”. EARLINET has its requirements and criteria for all the affiliated lidar stations, as well as data processing algorithm, the Single Calculus Chain. I am not sure what devices and algorithms you are referring to.

[Answer: Thank you for pointing out this unclarify. The devices and algorithms mean to the aerosol lidars and their retrieval algorithms. The manuscript was modified accordingly to clarify this point.](#)

P3L80: reference missing

[Answer: The missing reference has been added in the manuscript.](#)

P3L81: assessment of -> assess

[Answer: It has been corrected.](#)

P3L83: “At present, China is starting to build...” This sentence not clear, please revise it. Here is an example, for your reference-- “Currently, China is in the process of building a ... network, which may lead to isolated and one-sided measurements from each observation station, therefore...spatial-temporal correlation...”

[Answer: Text was revised accordingly.](#)

P3L86-87: “With the gradual shift from qualitative measurement to the qualitative application of atmospheric lidar, ... high, and direct mutual ... level, China has” → As atmospheric lidars are shifting from qualitative to quantitative applications, ..., increasingly high. Therefore, direct mutual...level. China has...

[Answer: Text was revised accordingly.](#)

P4L95: in the other region → in other regions/countries.

[Answer: Text was revised accordingly.](#)

P4L99: This sentence is too long and lacks of clarity, please revise it. “Based on the lidar inter-comparison observation campaign on September 2021 in the south of Beijing observatory, this paper introduces the lidar quality assessment strategy based on experience of EARLINET

on self-calibration and inter-comparison methods for systematic improvement of lidar hardware, and evaluates the reliability of the 1064 nm channel of many sets of lidar systems, analyzes the deviation of the Mie-Rayleigh signal and its influence on the backscatter coefficient.”

[Answer: The sentence has been re-written as suggested.](#)

P4L100: relatively, ....., single wavelength -> single-wavelength

[Answer: Text was revised accordingly.](#)

P4L105: on the results on the lidar signal....

[Answer: Text was revised accordingly.](#)

P4L110: , which was -> . It was

[Answer: Text was revised accordingly.](#)

P4L111: Cirrus was... and covered

[Answer: Text was revised accordingly.](#)

P4L112: in most of the time

[Answer: Text was revised accordingly.](#)

P4L113: feature -> featured

[Answer: Text was revised accordingly.](#)

P4L114: Maybe it is more accurate to say “emission and reception modules” instead of “transmitting and receiving modules “.

[Answer: The text has been revised as suggested.](#)

P4L121: The 1064 nm light -> the backscattered 1064 nm light

[Answer: Text was revised accordingly.](#)

P5L127: of which→ on which

[Answer: Text was revised accordingly.](#)

P5L129: In this sentence “The first part is self-validation or calibration according...”, what are the difference between (self-) validation and calibration? If these two terms are referring to the same thing, there is no need to use different terminology here, it could confuse the readers. The authors should also check if there are confusions of terminology elsewhere in

the manuscript, such as self-test, self-validation, calibration, verification... and so on.

[Answer: We thank the reviewer for pointing out this inconsistency in the description.](#)

[Text was revised with a same terminology.](#)

P5L131: CMA not defined

[Answer: The manuscript was modified to explain the abbreviations: the CMA is an acronym for China meteorological administration.](#)

P5L131-134: “With the CMA’s goal of promoting the use of lidar instruments and their data among the Chinese lidar network, the inter-comparison at the hardware level was made, in terms of range corrected lidar return signals inter-compared directly, and also the inter-comparison of aerosol backscatter coefficient at 1064 nm retrieved by each lidar system was performed in this study.” This sentence is not correct in grammar, please think of breaking long sentence into shorter ones for simplicity and clarity.

[Answer: The sentence has been re-written.](#)

P6L137: “so that makes it ...”-> This uniformity in data collection makes the inter-comparison easier.

[Answer: Text was revised accordingly.](#)

P6L144: of each system. Again, the sentence is too long and contains fragments.

[Answer: The sentence has been re-written.](#)

P6L147: due to the difference in each system efficiencies -> due to different lidar efficiencies/  
Transmissions

[Answer: Text was revised accordingly.](#)

P7L150: Please specify what  $\lambda_r$ ,  $\lambda_0$  and I are.

[Answer: The manuscript was modified accordingly to clarify all these symbols.](#)

P7L151: please revise this sentence “It should be compared with simultaneous observation, and continuously collecting the original data for at least 180 minutes, and selecting a period of no less than 30 minutes where the aerosol vertical distributions are stable.”

[Answer: Text was revised accordingly.](#)

P7L152: “The rang-square-correction signal” what is it? Range-corrected signal is commonly

used in the lidar community.

Answer: Text was revised accordingly. "Range-corrected signal" has been used consistently in the whole manuscript.

P7L157: No. Ref lidar is confusing, better call it reference lidar for clarity.

Answer: Text was revised as suggested.

P7L170: I do not see the link between signal saturation and fitting molecular signal to RCS. please explain.

Answer: The sentence has been re-written to clarify this point.

Because the effects caused by saturation of detectors can be found from lidar signal intensity, thus we decided to fit the molecular attenuated backscatter coefficient to the RCS of each lidar system in this study.

P7L172: "...a good signal-to-noise ratio except No. L05 lidar adopted...". Break into 2 sentence  
"...a good signal-to-noise ratio. However, No. L05 lidar adopted....at such range"

Answer: Text was revised accordingly.

P7L174: typo: a space missing 'than' and '5%'

Answer: Text was revised accordingly.

P8L177--L179: Could you give more comment about the data quality of lidar No.05? Is it possible to correct this electronic noise? Could this mismatch with Rayleigh fit be caused by other reasons, for example, the divergence of laser beam? Have you ever got better Rayleigh fit from this lidar?

Answer: The analog signal from APD commonly suffers from the electronic noise.

Yes, it is possible to correct. A method to correct such issue was proposed by Freudenthaler, V. et.al. 2018, but it has to be done after each observation. It might be the other reason caused by the divergence of laser beam, however we are not able to check. Due to the very limited measurement period, we have not got better Rayleigh fit from this lidar.

Freudenthaler, V., Linné, H., Chaikovski, A., Rabus, D., and Groß, S.: EARLINET lidar quality assurance tools, Atmospheric Measurement

Techniques Discussions, pp. 1–35, 2018.

P8L180: Better to write "In this test, lidar profiles in every 30-minute time intervals were

averaged.”

Answer: Text was revised accordingly.

P9 Figure 4: To me, raw lidar signal means it is without any correction, such as deadtime, bin shift, etc. In Figure 9, I guess corrections have been applied.

Answer: Yes, in figure 9, the corrections haven been applied. We agree with the reviewer, so the “raw lidar signal” changes to “corrected lidar signal by deadtime, bin shift corrections”

The manuscript was modified to clarify these points.

P10L193: This is a bit confusing, please rephrase it “which also means they can be used to observe the vertical distributions of aerosol and cloud without knowing the determining the amounts”.

Answer: The sentence has been re-written for clarify.

P10L194: quantitative analysis→ quantitatively analyze

Answer: Text was revised accordingly.

P10L194: it is not proper to call it ‘accuracy’, better to use ‘difference’

Answer: We agree with the reviewer. Text was revised accordingly.

P10L195: overlap properties may cause misunderstanding, you can simply say ‘overlap ranges’

Answer: Text was revised as suggested.

P10L197: “In this investigation, single.....was selected”→ “Lidar observations between 18:30 and 19:00 CST from each lidar system were averaged for inter-comparison. ”

Answer: Text was revised as suggested.

P10L198: From the quicklooks, the readers can see the presence of aerosol layers in the range of 1500-2000, why did you normalize the lidar signal in the aerosol layer although you have mentioned in the previous sentence that the range 2000-5000 was expected to be clean?

What if you normalize at higher altitude, should the results be better?

Answer: We thank the reviewer for pointing out this miss-understanding.

The reason to select the range of 1500-2000 is because the signal distortion of No.L05 lidar at the range between 2000 m and 5000 m.

The manuscript was modified accordingly to clarify this point.

P11L202-L203: A few grammar mistakes in this sentence. Please rewrite it, here is one example “Due to the significant differences in the incomplete overlap region between different lidar systems, large relative deviations were observed within the 500 m range (Figure 6, b). As a result, a meaningful comparison cannot be made”

[Answer: Text was revised as suggested.](#)

About P10 Figure 5:

■ The ticks of Figure 5(c,d) are partly cut off, please replace with complete figures

[Answer: Plot was replaced as suggested.](#)

■ The structures within boundary layer looks similar in all quicklooks except for Figure 5(e), could you comment on that?

[Answer: The structures within boundary layer were same, but only the color bar were scaled differently.](#)

■ Where do the repeating white stripes in Figure 5(b) come from? Is it a technical anomaly?

[Answer: Yes, it is a technical anomaly due to some operation issues.](#)

[The manuscript was modified accordingly to clarify this point.](#)

■ In Figure 5(a) and 5(c), we see ripples in the transported aerosol layer below 3000 m from 19:00 to 23:00, can you comment on that?

[Answer: the ripples was caused by unstable laser energy due to the rapid temperature change.](#)

P11, P12: Figure 6(c) and 7(c) do not carry so much information, therefore not necessary.

[Answer: Figure 6\(c\) and 7\(c\) present the mean standard deviation in the high aerosol loading and low aerosol loading distributed range. Such information is useful to avoid the effect by the spatial variance. The manuscript was modified accordingly to clarify this point.](#)

P13: Please write how you determine system noise and random noise and put references

The reviewer stops listing corrections of English writing from Page 11 and advices the author and coauthors to correct it by themselves.

[Answer: The random noise is determined by mean standard deviation of background noise, and the system noise is determined by mean standard deviation of random noise of all the ranges.](#)

[The manuscript was modified accordingly to clarify this point.](#)



Figure 8: (1) The scales of Y-axis in Figure 8(a) and Figure 8(b) are so different, making it difficult to conclude. (b) For Figure 8(b), did you take multiple dark measurements for L05 in order to check if such noises are stable or not?

Answer: The dimensions between analog and PC mode are not comparable, so the scales are meaningless, but the structure variation with the range is an indicator to judge the data quality. The systemic noise was always exist in this lidar.

P14L267: “we found ... also such lidar system has a possibility to be miniaturization”. It is not appropriate to draw such conclusion, because this paper does not talk about the miniaturization.

Answer: We agree with the reviewer. So we decided to remove this sentence.
